# Supplementary material
Source: Research Square preprint supplement (doi:10.21203/rs.3.rs-9507216/v1)
Supplement: Supplementary file 1 [file 9d244114c0f209d119fbe928.docx]

**“Apple Sign” in Epiglottic Inclusion Cyst**

Changqing Wang

Department of Otolaryngology, People's Hospital of Xishuangbanna Dai Nationa-

lity Autonomous Prefecture, Yunnan, China.

Correspondence to：Changqing Wang,Department of Otolaryngology, People's Hospital of Xishuangbanna Dai Nationality Autonomous Prefecture,

No. 4, Galan South Road, Jinghong, Xishuangbanna,666100.Yunnan, China.

1. Mail:[wchq51888@163.com](mailto:minwang333@sina.com)

Changqing Wang COVID:0000-0001-7679-4837

**Author contributions** All authors contributed to the conception, design, and drafting of this submission in its final format.

**Funding** The authors declare that no funds, grants, or other support were received during the preparation of this interesting image.

**Declarations**

**Consent to participate** The written informed consent for publication was obtained from the patient.

**Consent to publish** The authors affirm that human research participants provided informed consent for publication of the images in Fig. 1.

**Competing interests** The authors have no relevant financial or nonfinancial interests to disclose.
